# Supplementary material for: The COACH prompting system to assist older adults with dementia through handwashing: An efficacy study
Source: Springer Nature journal article supplement (doi:10.1186/1471-2318-8-28), 2008-11-07

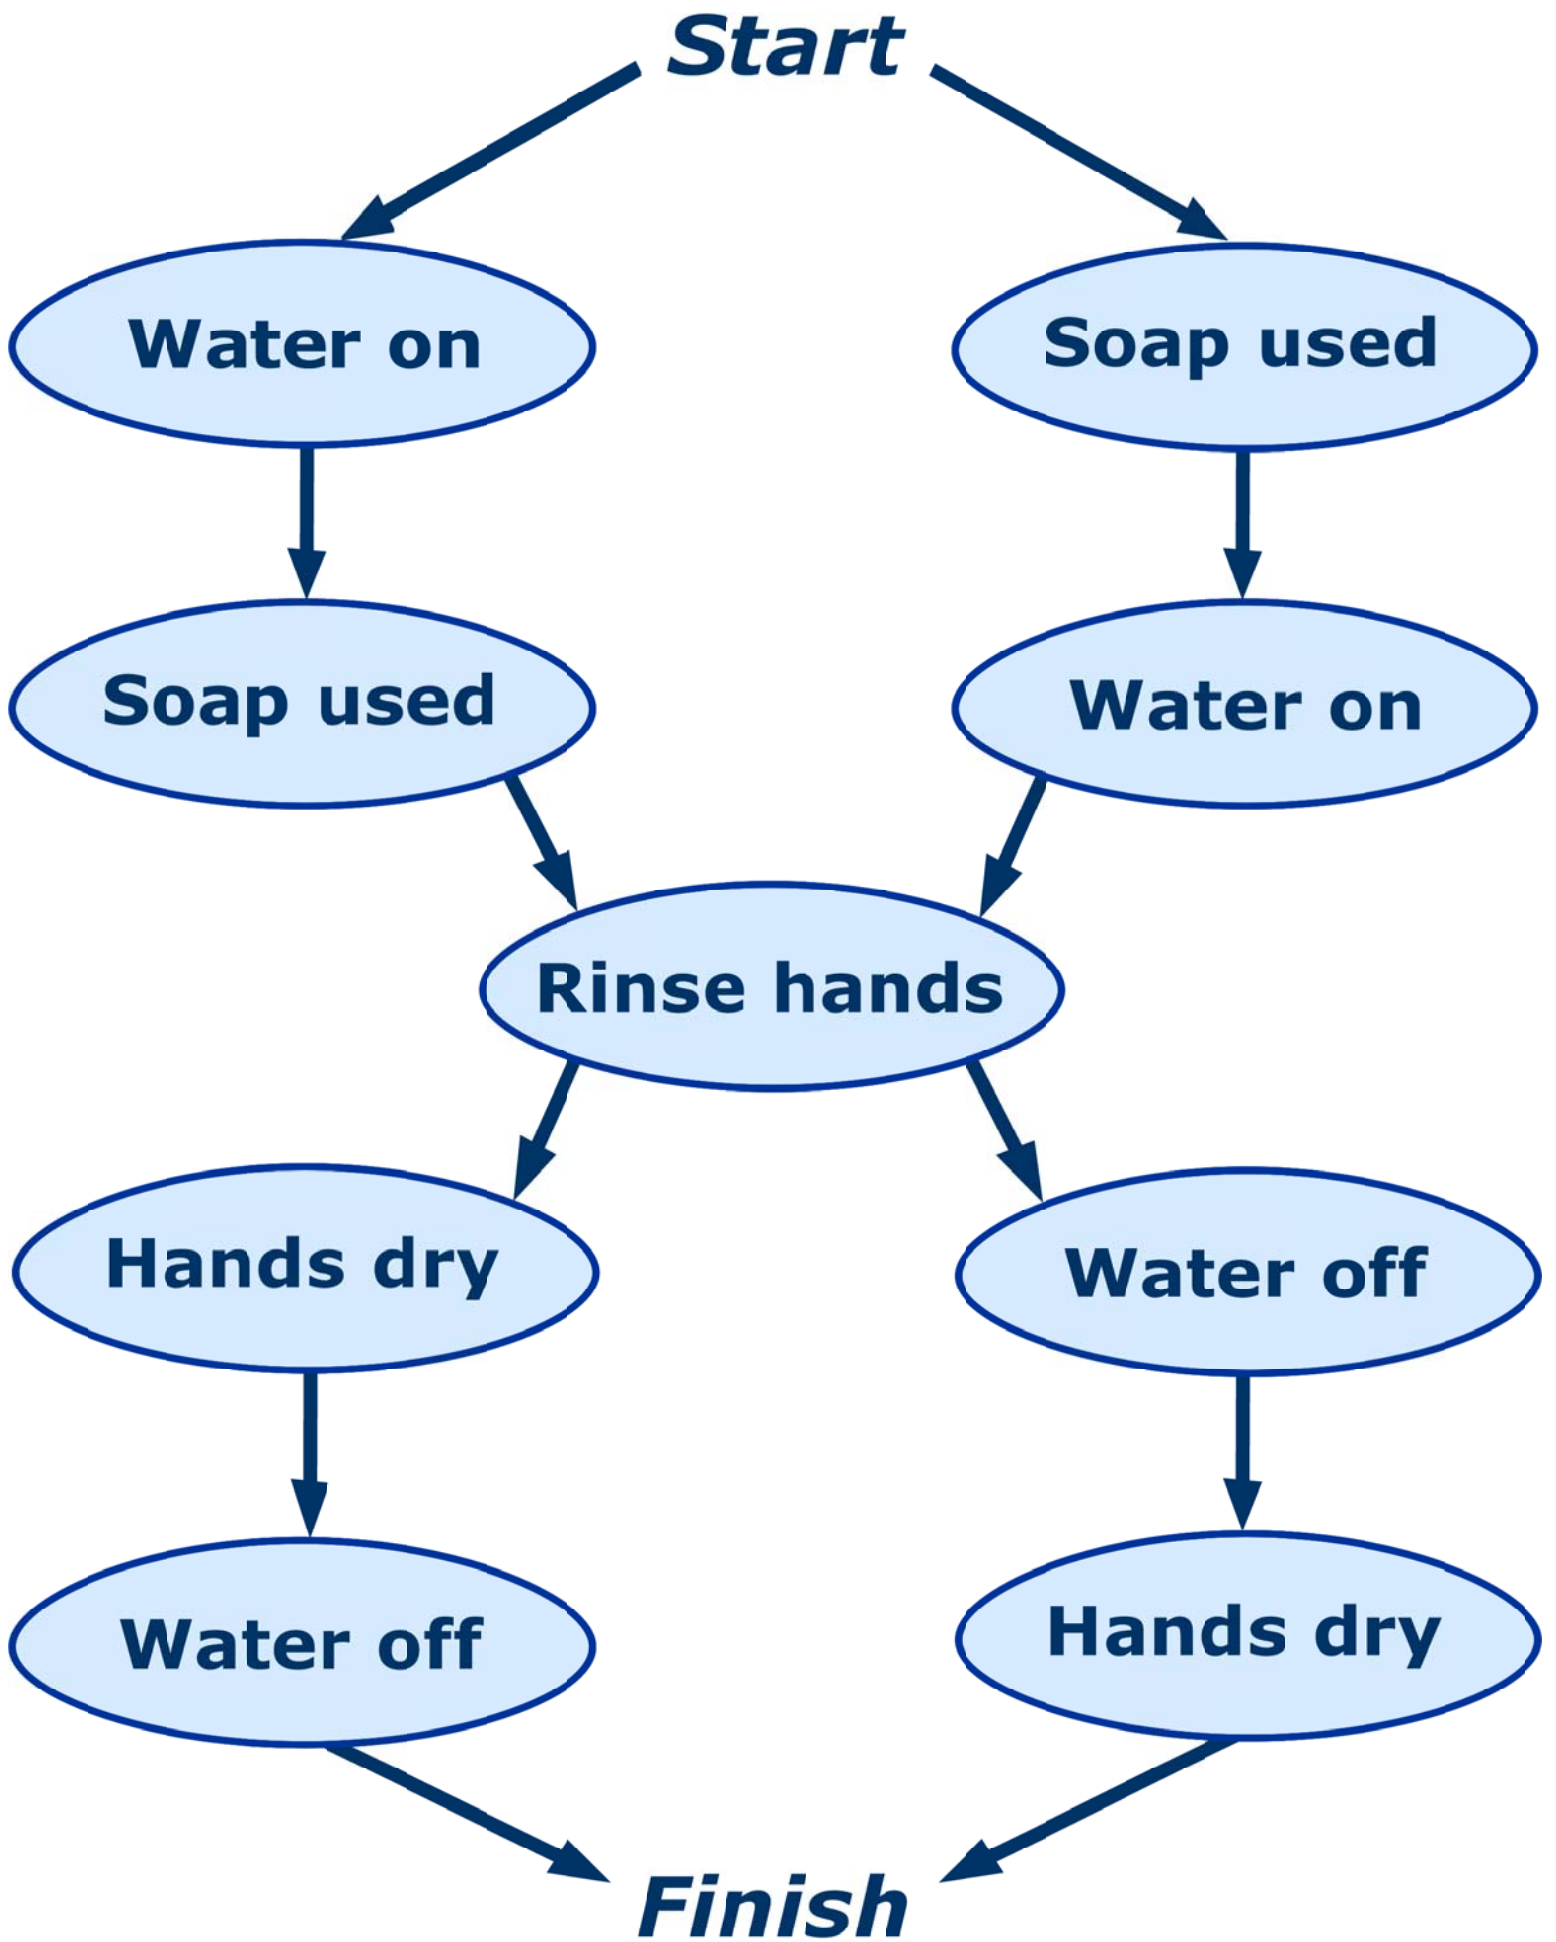

Supplement: 12877_2008_122_MOESM1_ESM.pdf [file 12877_2008_122_MOESM1_ESM.pdf]
